# Supplementary material
Source: Springer Nature journal article supplement (https://www.springermedizin.de/resource/supplementary/12970_2010_174_MOESM2_ESM.pdf/9594514)

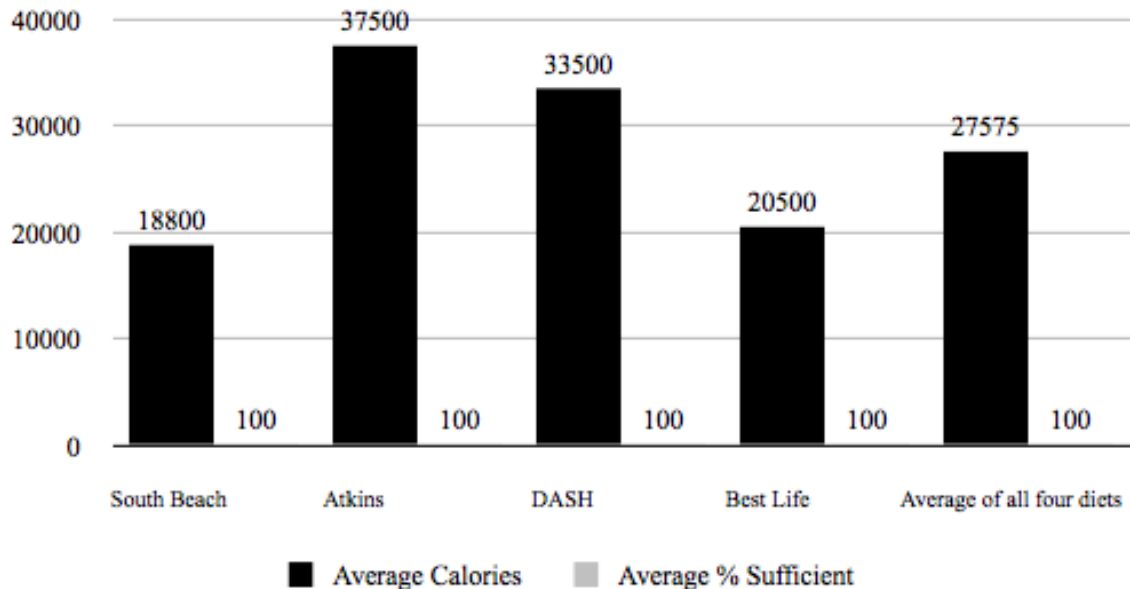

Supplement: MOESM2 [file 9594514]
